# Supplementary material
Source: PubMed Central journal article supplement (PMC10148230)
Supplement: jamainternmed-e231838-s002.pdf [file jamainternmed-e231838-s002.pdf]

## Data Sharing Statement

Ayers. Comparing Physician and Artificial Intelligence Chatbot Responses to Patient Questions Posted to a Public Social Media Forum. *JAMA Intern Med.* Published April 28, 2023.

doi:10.1001/jamainternmed.2023.1838

### Data

**Data available:** Yes

**Data types:** Data (not involving human participants)

**How to access data:** The data were made publicly available on Dataverse at

<https://dataverse.harvard.edu/dataset.xhtml?persistentId=doi:10.7910/DVN/BZARC3>

**When available:** With publication

### Supporting Documents

**Document types:** None

### Additional Information

**Who can access the data:** The public.

**Types of analyses:** Any types of analyses.

**Mechanisms of data availability:** Dataverse sets the terms of service.
